# Supplementary material for: The competing impacts of climate change and nutrient reductions on dissolved oxygen in Chesapeake Bay
Source: Copernicus journal article supplement (doi:10.5194/bg-2017-416), 2017-10-17
Supplement: Supplementary file [file bg-2017-416-AC2-supplement.pdf]

**Author responses to the Referee's comments are included in blue.**

## **Anonymous Referee #2**

The study on impacts of climate change and nutrient reductions on dissolved oxygen in Chesapeake Bay is well written and addresses an interesting topic.

We would like to thank Anonymous Reviewer #2 for their review of our manuscript, and are glad to hear that they found the manuscript to be well written. As Reviewer #1 noted, it is a challenge to present such complex results (with so many variables changing in time and x,y,z space) in a concise manner.

However, there are many shortcomings of the chosen approach:

The reviewer's comments make us feel that perhaps the overall objectives of our study may not have been clear. Our study is structured as an initial exploration of the potential ramifications of the *first order* impacts of climate change on oxygen concentrations in the Chesapeake Bay. In the Chesapeake Bay region many researchers, ourselves included, are working on long-term ~50-year simulations that include all possible climate effects: changes in solar radiation, humidity, and winds for example, in addition to the other effects examined here (changes in temperature, precipitation and sea level rise). This initial study, however, opts for a different and less complex approach, whereby the impacts of a few first order factors are studied in detail via sensitivity analysis. We by no means have meant to imply that we are predicting what the Bay will look like in 2050. We leave this to future work that is focusing on incorporating all climate change effects simultaneously, and running realistic 50+year simulations.

In the first sentence of our "*Methodological Limitations*" section we explicitly state: "***This research is a first order look at the potential impacts that changes in climate may have on the efficacy of nutrient reduction efforts in the Chesapeake Bay; however, more robust examinations of the problem are needed in order to adequately aid in the regulatory decision making process going forward.***" We also end this section by saying: "***To address these limitations, an effort to conduct a continuous simulation from 2015 – 2050 including both gradual implementation of the nutrient reductions and climate change impacts is currently underway.***" However the reviewer's comments indicate to us that this clearly needs to be explained up front in the introduction as well.

To address this comment we are modifying our introduction to make our objectives for this analysis, and our future work, clearer for future readers.

We appreciate the opportunity to address each of the reviewer's specific comments below.

1) *The simulations did not consider the impact of temperature changes on hydrodynamics. Wind and evaporation did not change by definition. Only the impacts of*

*increases in air temperature, global sea level, river flow and nutrient loads (related to river flow) were considered. Hence, the approach is not dynamically consistent.*

As described on line 180, air temperature was actually not changed in our sensitivity studies. Instead, water temperature was changed consistently throughout the water column. This choice is rationalized in the following paragraph (lines 180-195) where we cite prior studies that have documented that surface and bottom waters of the Bay are warming uniformly and thus have limited impact on Bay hydrodynamics. Stratification in the Chesapeake Bay is primarily governed by salinity, not temperature, and therefore future warming is not likely to significantly impact stratification. The significant impact of future temperatures on continental shelf and open ocean stratification is well known; however previous studies have indicated that this will likely not be a significant effect in Chesapeake Bay. Again, here we are only looking at first-order climate change impacts on DO – the impact of changes in temperature on solubility and growth/grazing/remineralization dynamics. Future work will look at the second-order effect of warming-induced hydrodynamic changes on hypoxia.

*2) A time slice approach was chosen and the transient behavior was neglected. A period of only three years was investigated. Uncertainty caused by natural variability was not investigated. In particular, the impacts of the large variability of sea level pressure and wind fields on the simulation results were not considered because the time slices are too short. Hence, it is not clear to me whether the calculated changes in dissolved oxygen concentrations are statistically significant.*

A “time slice” approach typically involves running a simulation at a future time interval, for example 2046-2050, rather than for a complete long-term simulation, e.g. 1990-2050. Here we opt for neither of these approaches, but instead adopt a third approach that involves looking at the sensitivity of a simulation to environmental changes. Our four-year simulations (one year spin-up, three year simulation) are not meant to be representative of 2046-2050. Instead we hold winds, humidity and solar radiation constant in order to look at the sensitivity to first-order environmental impacts. We must make this point clearer in our methods section, so that future readers are not confused about this point.

Also we note that natural interannual variability in Chesapeake Bay hypoxia is overwhelmingly dominated to first order by whether a particular year is characterized by higher than average rainfall (a “wet” year) or lower than average rainfall (a “dry” year). Here we carefully investigate both very wet and very dry years. We do document differences in results for the two “types” of years (recall our finding that a wet year with the TMDL nutrient reductions has more hypoxia than a dry year without the nutrient reductions), but generally our primary conclusions hold regardless of whether a year is particularly wet or dry.

*3) The applied changes in air temperature, sea level and river flow were estimated from ensemble mean values from global model simulations from the literature (partly grey literature) and are not consistent results of changing climate in the region. In particular,*

*it was impossible for me to understand how the watershed simulations were done. A regional climate model with sufficient horizontal resolution was not applied. Hence, the simulations are not dynamically consistent projections. I suggest to call them sensitivity studies.*

Yes, we absolutely agree that throughout the manuscript we are performing “sensitivity studies” and are not providing “projections” for 2050. This is an important change that we must make throughout our manuscript, specifically in our introduction where we describe the paper’s objectives. We appreciate the reviewer pointing out this source of confusion.

We also apologize that our methods for deriving future river flow were not clear. We see the reviewer’s confusion and feel that in our revised manuscript it will be better to state up front what changes in flow we are imposing (Table 2) and then describe how these estimates are consistent with what we know from the literature. This is analogous with what we did in the previous sections (2.3.1 and 2.3.2). This will also help make it clearer to future readers that we are indeed performing sensitivity experiments, and not trying to project what dissolved oxygen concentrations will actually be in 2050.

*4) The uncertainty of projected future climate caused by biases of global climate models was not assessed. Usually there is a large spread of projected changes around the ensemble mean. The spread of the calculated changes in dissolved oxygen concentrations may be larger than the differences between the impact of nutrient load changes and the impact of climate change on the results. Hence, the conclusions on the competing impacts may not hold in a multi-model ensemble approach.*

It is true that we did not assess the impacts of biases in the Global Climate Models, but this is because we are performing a sensitivity study, examining how sensitive Chesapeake Bay oxygen concentrations are to changes in water temperature, sea level rise and river flow.

Again, the goal of this paper, which absolutely needs to be clarified in our introductory paragraphs as we mention in our response above, is to provide a first look at the sensitivity of oxygen concentrations and hypoxic volume to these environmental forcing changes. Ideally the sensitivity of the estuary would be tested for a number of different temperature changes that would encompass uncertainties in future temperatures estimated by various GCMs and RCP scenarios (perhaps looking at a change of 1°C and 3°C as well as our 1.75°C experiment). An additional analysis that involves examining the increase in temperature required to completely nullify all positive impacts of the TMDL reduction (for DO < 5 mg/L) could be conducted. (Recall from Figure 4 that an increase of 1.75°C results in a 40% reduction in the gains of the TMDL. A temperature of 3 or 4°C might result in a complete negation of all TMDL gains.) Because our results show hypoxia is not very sensitive to changes in SLR and changes in river inputs, it is far less critical to examine how sensitive hypoxia is to varying levels of SLR and river inputs.

5) *A greenhouse gas emission scenario RCP 4.5 was chosen. The question whether the conclusions would also hold for RCP 8.5, which is not necessarily less likely than RCP 4.5, was not addressed.*

As the reviewer notes, we report to only use the RCP4.5 scenario. However, in our revised manuscript we will reword this to say that we are performing sensitivity experiments that are generally representative of what might be expected in a RCP4.5 scenario. In fact the temperature change (1.75°C) we choose to examine is also generally consistent with what might be expected for RCP8.5, since, as we note in the manuscript: “for 2050 projections, studies have demonstrated that the difference between RCP scenarios is smaller than the spread of individual global climate models that utilize the RCP emission scenarios (e.g., Goberville et al., 2015).” Thus, if we were examining conditions in 2100, it would be more important to examine multiple RCP scenarios than multiple Climate Models, but in 2050 it is more important to examine multiple Climate models than multiple RCP scenarios. The next version of our manuscript will make it clearer that although our estimates of future change (required for our sensitivity studies) are broadly consistent with RCP4.5 assumptions, they are not very different from what we would expect for RCP8.5.

6) *Quantitative figures of changing nutrient concentrations and nutrient supply are not given. Hence, it is difficult to compare with other coastal seas with comparable environmental situation.*

This is an excellent point that reviewer 1 brought up as well. The revised manuscript will contain an additional table that includes the total amount of inorganic nitrogen entering the Bay for each experiment.

7) *Why has sea level rise a positive impact on dissolved oxygen concentrations in regions B and C? This result is unexpected. The authors state that the impact of increased stratification and residence time is smaller than the impact of increased estuarine circulation. Is this result supported by other model studies or possibly a short-coming of the present model?*

This was a surprising result to us as well, though we were reassured when presentations by the Chesapeake Bay Program’s modeling team showed the same result for their preliminary Mid-Point Assessment simulations (e.g. [https://www.chesapeakebay.net/channel\\_files/25275/purpose\\_of\\_wqstm\\_overview\\_6-5-17.pdf](https://www.chesapeakebay.net/channel_files/25275/purpose_of_wqstm_overview_6-5-17.pdf)). We feel that we can perhaps do a better job of explaining this result in the manuscript. Overall, the increase in sea level at the model’s open boundary (essentially a deeper opening at the Chesapeake Bay mouth) causes a significantly greater transport of oxygenated ocean water into the estuary at depth and a greater surface transport of water out of the estuary.

*In summary, the present study is not about changing climate with all its uncertainties and the approach does not support the provided conclusions that otherwise would have large impact on marine management. Hence, I recommend to perform longer*

*simulations to estimate uncertainties caused by natural variability (usually 30-year long simulations are recommended to address the statistics of weather). To estimate uncertainties due to model biases an ensemble of simulations driven by various global model results should be performed. Further, a high-end emission scenario like RCP 8.5 should be investigated to be able to conclude (perhaps) that the impact of changing climate does not counteract the impact of nutrient load reductions. I recommend a major revision.*

We completely agree with the reviewer that the present study is not about changing climate with all its uncertainties. As stated earlier, we must make this clearer to our readers up front in the introduction. Instead, it presents sensitivity studies which illustrate the impact that three first order environmental variables may have on Chesapeake Bay oxygen concentrations in the future: water temperature, sea level rise and river flow. As discussed in our “*Methodological Limitations*” section, this work is being followed by a larger study involving experts in global climate models and downscaling techniques. This future study will indeed involve longer-term simulations (1985-2050), address uncertainties in climate model biases, and directly include changes in humidity, solar radiation and winds, in addition to the variables investigated here. Nevertheless, we feel that our results here are robust and worthy of publication as they have clearly established several new results that have not been published before, namely that: (1) the potential impacts of climate change will be significantly smaller than improvements in DO expected in response to the required nutrient reductions, especially at the anoxic and hypoxic levels, and (2) increased temperature exhibits the strongest control on the change in future DO concentrations, while sea level rise is expected to exert a small positive impact and increased winter river flow is anticipated to exert a small negative impact.

Our revisions in response to Reviewer #2's comments will make this a much stronger manuscript; we are very appreciative of the time spent reviewing and providing these comments.
